# Supplementary material
Source: publisher figshare collection journal article supplement (https://acs.figshare.com/ndownloader/files/3593568)
Supplement: Supplementary file 1 [file 3593568]

# Engineered CuInSe<sub>x</sub>S<sub>2-x</sub> Quantum Dots for Sensitized Solar Cells

Hunter McDaniel,<sup>\*,†</sup> Nobuhiro Fuke,<sup>\*,§</sup> Jeffrey M. Pietryga, and Victor Klimov<sup>\*</sup>

<sup>†</sup>Center for Advanced Solar Photophysics, Department of Chemistry, Los Alamos National Laboratory, Los Alamos, New Mexico 87545, USA

<sup>§</sup>Materials & Energy Technology Laboratories, Corporate Research and Development Group, Sharp Corporation, 282-1 Hajikami, Katsuragi, Nara 639-2198, Japan

<sup>\*</sup>AUTHOR EMAIL ADDRESSES: [hunter@lanl.gov](mailto:hunter@lanl.gov); [fuke.nobuhiro@sharp.co.jp](mailto:fuke.nobuhiro@sharp.co.jp); [klimov@lanl.gov](mailto:klimov@lanl.gov)

## Supporting Information

### Additional experimental Details

#### General synthesis considerations

Reactions were carried out in a standard Schlenk line under argon atmosphere. Technical grade oleylamine (70%), technical grade trioctylphosphine (TOP) (90%), technical grade 1-octadecene (90%), technical grade oleic acid (90%), 1-dodecanethiol (98%), tert-butylamine (98%), CdO (99.5%), Se powder (99.99%), S powder (99.5%), indium acetate (In(III)(Ac)<sub>3</sub>) (99.99%), copper iodide (Cu(I)I) (99.5%), anhydrous methanol (99.8%), anhydrous acetone (99.8%), anhydrous octane (99.9%), and anhydrous chloroform (99.9%) were obtained from Sigma Aldrich. Anhydrous sodium sulfide (Na<sub>2</sub>S) was purchased from Alfa Aesar. Materials were used as received.

### Characterization

#### Transmission Electron Microscopy (TEM)

Transmission electron microscopy (TEM) samples were prepared on Cu grids (obtained from Ted Pella) with a thin carbon film on a holey carbon support from a dilute solution of NCs in chloroform. TEM analysis was carried out with a JEOL 2010 TEM operating at 200 kV.

### **Scanning Electron Microscopy (SEM) and X-ray Dispersive Spectroscopy (EDX)**

Scanning electron microscopy (SEM) samples were prepared by breaking a QDSSC anode in half, then the cross-section was analyzed using a Quanta 400 FEG from FEI Company operating at 10kV. The electron beam was scanned across the cross-section and the energy and the count of X-rays were analyzed to produce an EDX scan. Elemental analysis was conducted using Genesis EDX software

### **Absorption and Photoluminescence (PL) Spectroscopy**

All optical measurements of QDs in solution were performed in either chloroform or octane using a quartz or optical glass cuvette. UV-vis absorption spectra were obtained with Agilent 8453 photodiode array spectrometer. Visible static PL was measured on a Horiba-Yvon Fluoromax 4 with 500 nm excitation. Time resolved PL was measured on the same Horiba-Yvon Fluoromax 4 with a pulsed 455 nm LED excitation. Near-IR PL measurements were performed under 808 nm diode laser excitation using a liquid N<sub>2</sub> cooled InSb detector with a grating monochromator. The excitation was mechanically chopped and the signal was enhanced with a lock-in amplifier.

### **Solar Cell Characterization**

The EQE measurements were performed using QE/IPCE Measurement Kit equipped with 150 W Xe lamp (no. 6253, Newport) as a light source and Oriel Cornerstone monochromator. The light intensity was adjusted with a series of neutral density filters and monitored with a Newport optical power meter 1830C power meter with a calibrated Si power meter, Newport model 818 UV. The photocurrent generated by the device was measured using a Keithley 6517A electrometer. Communication between the instruments and the computer was facilitated via a GPIB interface and the instrument control and data processing were performed using software written locally in

Labview. Current voltage (I-V) measurements were performed using a Keithly 2400 SourceMeter as part of a model SC01 solar cell characterization system (software and hardware) built by PV Measurements. A class ABA solar simulator (AM 1.5 ), also built by PV Measurements, was calibrated using a Newport-certified single crystal Si solar cell, then was used to irradiate the QDSSCs during I-V measurement. The voltage was swept from -0.1V to 0.6V at 0.01 V/step with a 1s hold-time at each point prior to measurement. A square black mask ( $0.2209 \text{ cm}^2$ ) was attached to the solar cells to prevent irradiation by scattered light.

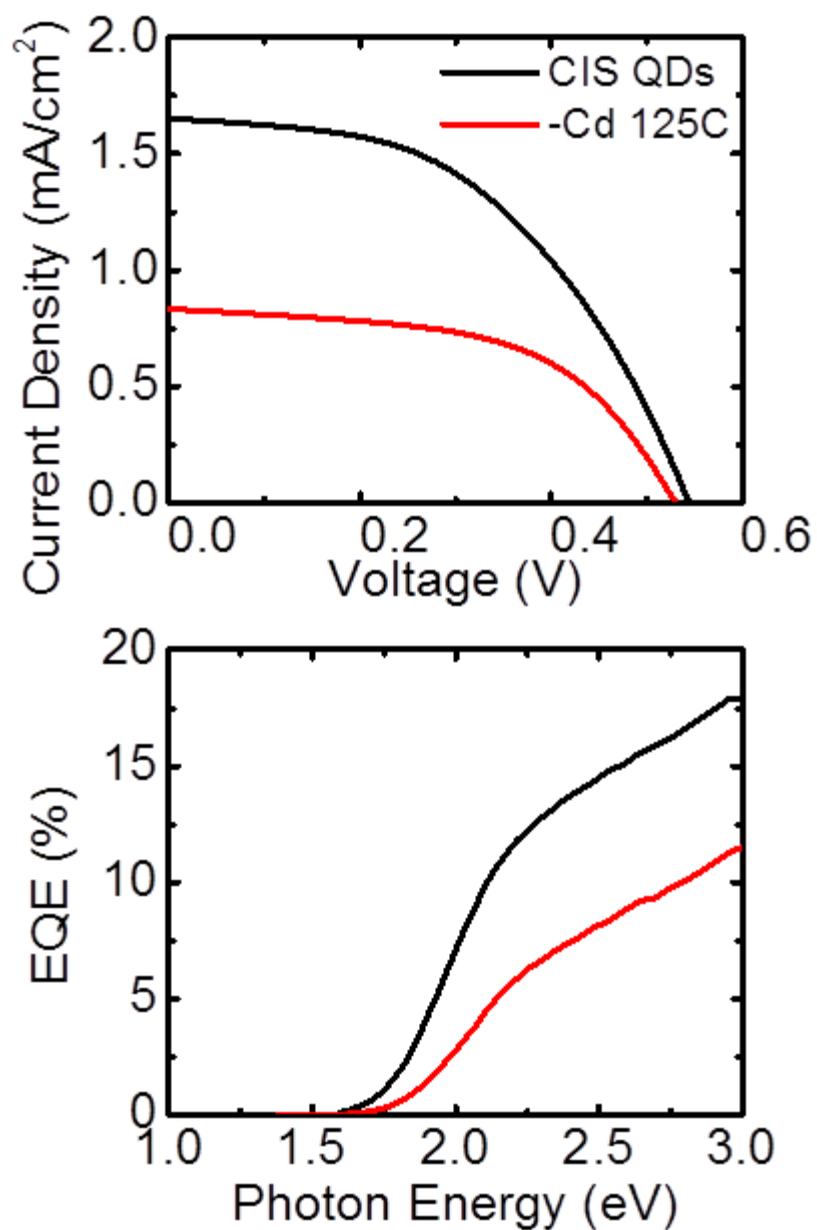

**Figure S1:** I-V (top) and EQE (bottom) data for QDSSCs made with CuInS<sub>2</sub> (CIS) QDs (no Se) without (black) and with (red) Cd-oleate treatment at 125 °C. The lower performance with the Cd treatment is primarily attributed to very poor QD loading in the film (*i.e.* lighter color for the Cd-treated QD-sensitized mp-TiO<sub>2</sub> film after sensitization).

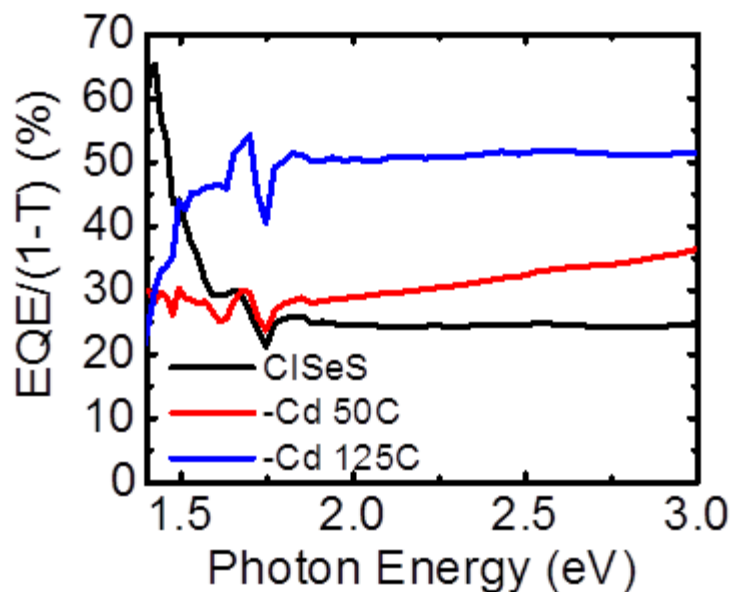

**Figure S2:** EQE/(1-T) compiled from the EQE and (1-T) data shown in Figure 3. EQE/(1-T) provides a lower limit for the internal quantum efficiency (IQE) of the devices.

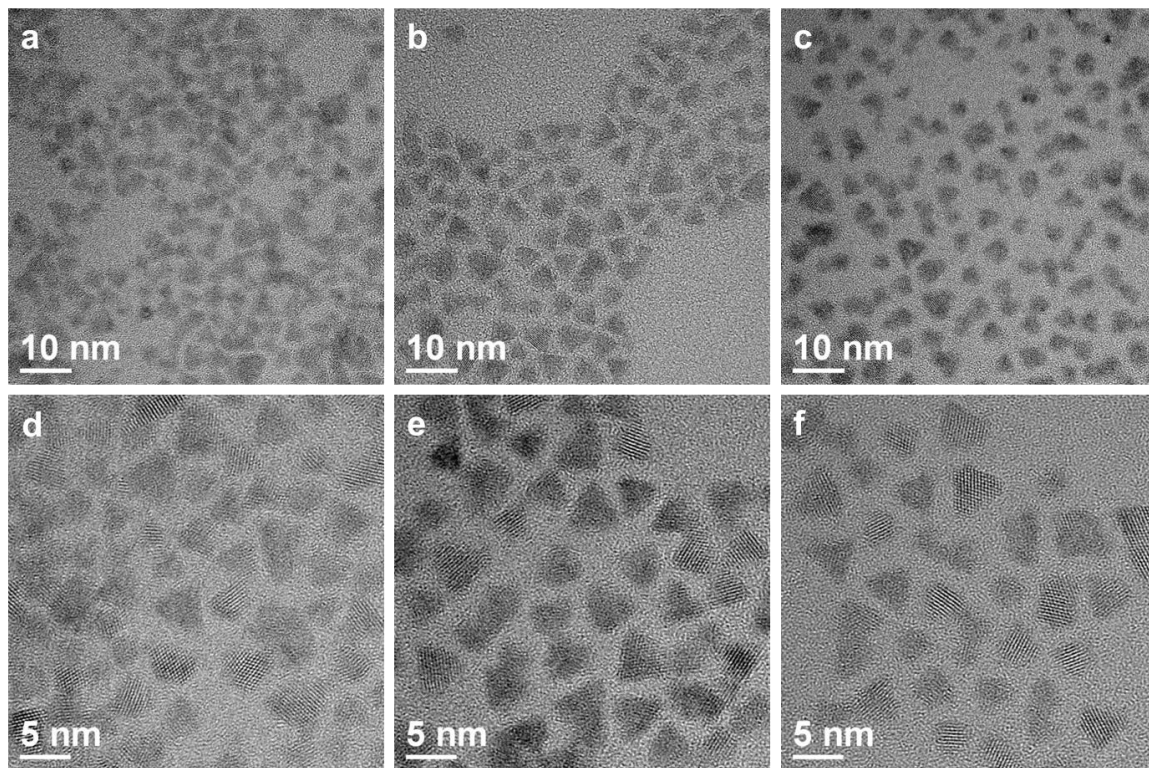

**Figure S3:** Low (a-c) and high (d-f) magnification TEM images of  $\text{CuInSe}_{1.4}\text{S}_{0.6}$  QDs before cation exchange (a,d), after cation exchange at 50 °C (b, e), and after cation exchange at 125 °C (c, f). Size is measured from a vertex to the middle of the opposite edge of the triangular shapes for 30 QDs in each case; the average sizes were 4.23 nm ( $\pm 0.30$  nm) before cation exchange, 4.13 nm ( $\pm 0.26$  nm) after cation exchange at 50 °C, and 4.10 nm ( $\pm 0.27$  nm) after cation exchange at 125 °C. The QDs shown are the same QDs characterized in Figure 1b, Figure 2, and Figure 3, although they have not been recapped.

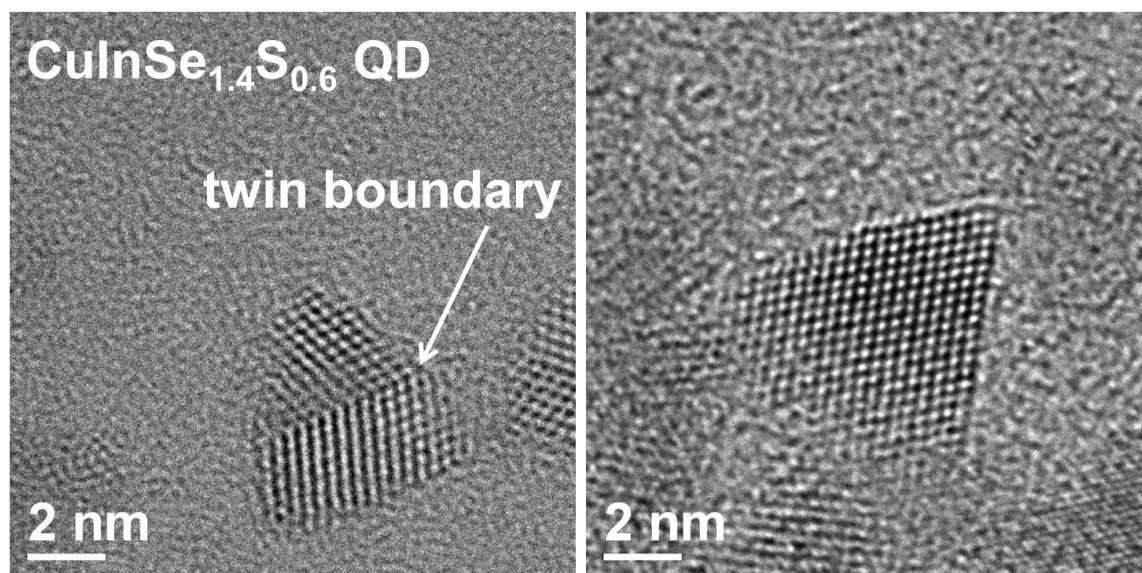

**Figure S4:** High resolution TEM images of larger than average CuInSe<sub>1.4</sub>S<sub>0.6</sub> QDs (no cation exchange). Aside from the occasional twin boundary (left), these QDs appear to have a homogeneous crystal structure with uniform lattice constants throughout.



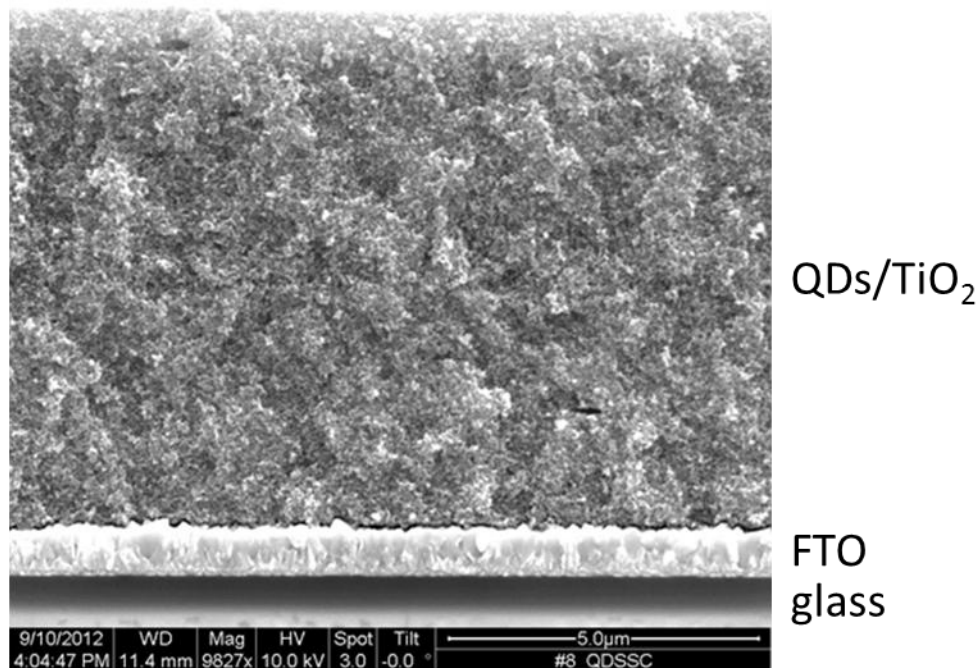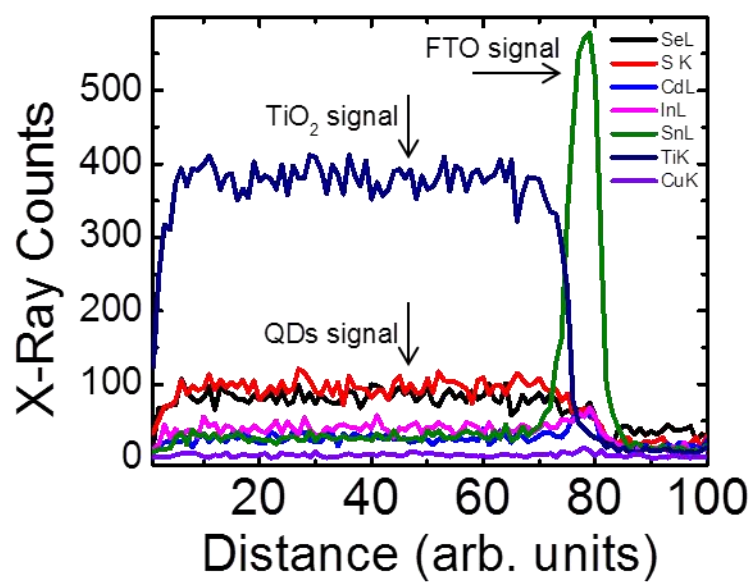

**Figure S5.** SEM cross section image of a sensitized film on FTO coated glass (top). Raw data of an EDX line scan of this cross section showing the even concentration of QDs throughout the mp-TiO<sub>2</sub> film.

| <b>Day 1</b>      | <b>V<sub>oc</sub> (V)</b> | <b>J<sub>sc</sub> (mA/cm<sup>2</sup>)</b> | <b>FF</b>    | <b>PCE (%)</b> |
|-------------------|---------------------------|-------------------------------------------|--------------|----------------|
| <b>ClSeS QDs</b>  | <b>0.425</b>              | <b>3.59</b>                               | <b>0.470</b> | <b>0.72</b>    |
| <b>-Cd 50C</b>    | <b>0.545</b>              | <b>6.36</b>                               | <b>0.576</b> | <b>2.00</b>    |
| <b>-Cd 125C</b>   | <b>0.535</b>              | <b>5.14</b>                               | <b>0.587</b> | <b>1.61</b>    |
| <b>-Cd 50C DL</b> | <b>0.535</b>              | <b>8.72</b>                               | <b>0.511</b> | <b>2.38</b>    |

| <b>Day 4</b>      | <b>V<sub>oc</sub> (V)</b> | <b>J<sub>sc</sub> (mA/cm<sup>2</sup>)</b> | <b>FF</b>    | <b>PCE (%)</b> |
|-------------------|---------------------------|-------------------------------------------|--------------|----------------|
| <b>ClSeS QDs</b>  | <b>0.115</b>              | <b>0.34</b>                               | <b>0.257</b> | <b>0.01</b>    |
| <b>-Cd 50C</b>    | <b>0.535</b>              | <b>6.78</b>                               | <b>0.573</b> | <b>2.08</b>    |
| <b>-Cd 125C</b>   | <b>0.545</b>              | <b>6.21</b>                               | <b>0.572</b> | <b>1.94</b>    |
| <b>-Cd 50C DL</b> | <b>0.545</b>              | <b>9.42</b>                               | <b>0.489</b> | <b>2.51</b>    |

**Figure S6:** Table of the photovoltaic properties of the I-V curves shown in Figures 3a and 3b.
